# Supplementary material for: How effective and cost-effective are behaviour change interventions in improving the prescription and use of antibiotics in low-income and middle-income countries? A protocol for a systematic review
Source: PubMed Central journal article supplement — BMJ Open. 2018 May 14;8(5):e021517. doi: 10.1136/bmjopen-2018-021517 (PMC5961598; doi:10.1136/bmjopen-2018-021517), 2018-05-14
Supplement: bmjopen-2018-021517supp001.pdf [file bmjopen-2018-021517supp001.pdf]

## **Appendix 1: World Bank Country Classification 2016**

### Low Income Countries (31)

Afghanistan; Benin; Burkina Faso; Burundi; Central African Republic; Chad; Comoros; Democratic Republic of Congo; Eritrea; Ethiopia; The Gambia; Guinea; Guinea-Bissau; Haiti; Democratic People's Republic of Korea; Liberia; Madagascar; Malawi; Mali; Mozambique; Nepal; Niger; Rwanda; Senegal; Sierra Leone; Somalia; South Sudan; Tanzania; Togo; Uganda; Zimbabwe

### Lower-middle Income Countries (52)

Armenia; Bangladesh; Bhutan; Bolivia; Cabo Verde; Cambodia; Cameroon; Republic of Congo; Cote d'Ivoire; Djibouti; Arab Republic of Egypt; El Salvador; Ghana; Guatemala; Honduras; India; Indonesia; Kenya; Kiribati; Kosovo; Republic of Kyrgyz; Lao PDR; Lesotho; Mauritania; Federated States of Micronesia; Moldova; Mongolia; Morocco; Myanmar; Nicaragua; Nigeria; Pakistan; Papua New Guinea; Philippines; Samoa; São Tomé and Príncipe; Solomon Islands; Sri Lanka; Sudan; Swaziland; Arab Republic of Syria; Tajikistan; Timor-Leste; Tonga; Tunisia; Ukraine; Uzbekistan; Vanuatu; Vietnam; West Bank and Gaza; Republic of Yemen; Zambia

### Upper-middle Income Countries (56)

Albania; Algeria; American Samoa; Angola; Argentina; Azerbaijan; Belarus; Belize; Bosnia and Herzegovina; Botswana; Brazil; Bulgaria; China; Colombia; Costa Rica; Cuba; Dominica; Dominican Republic; Equatorial Guinea; Ecuador; Fiji; Gabon; Georgia; Grenada; Guyana; Islamic Republic of Iran; Iraq; Jamaica; Jordan; Kazakhstan; Lebanon; Libya; Republic of Macedonia; Malaysia; Maldives; Marshall Islands; Mauritius; Mexico; Montenegro; Namibia; Palau; Panama; Paraguay; Peru; Romania; Russian Federation; Serbia; South Africa; St. Lucia; St. Vincent and the Grenadines; Suriname; Thailand; Turkey; Turkmenistan; Tuvalu; Venezuela
